# Supplementary material for: A hybrid pipeline for reconstruction and analysis of viral genomes at multi-organ level
Source: PubMed Central journal article supplement (PMC7439602; doi:10.1093/gigascience/giaa086), 2020-08-20
Supplement: giaa086_response_to_reviewer_comments_revision_1.pdf [file giaa086_response_to_reviewer_comments_revision_1.pdf]

## Author's Response To Reviewer Comments

Close

Dear Editor,

Thank you for accepting our article.  
All the changes have been made.

Best regards,  
Diogo

Close
