# Supplementary material for: A hybrid pipeline for reconstruction and analysis of viral genomes at multi-organ level
Source: PubMed Central journal article supplement (PMC7439602; doi:10.1093/gigascience/giaa086), 2020-08-20
Supplement: giaa086_supplemental_file.pdf [file giaa086_supplemental_file.pdf]

# Supplementary material of “A hybrid pipeline for reconstruction and analysis of viral genomes at multi-organ level”

D. Pratas, M. Toppinen, L. Pyöriä, K. Hedman, A. Sajantila, M. Perdomo

## 1 Supplementary Figures and Tables

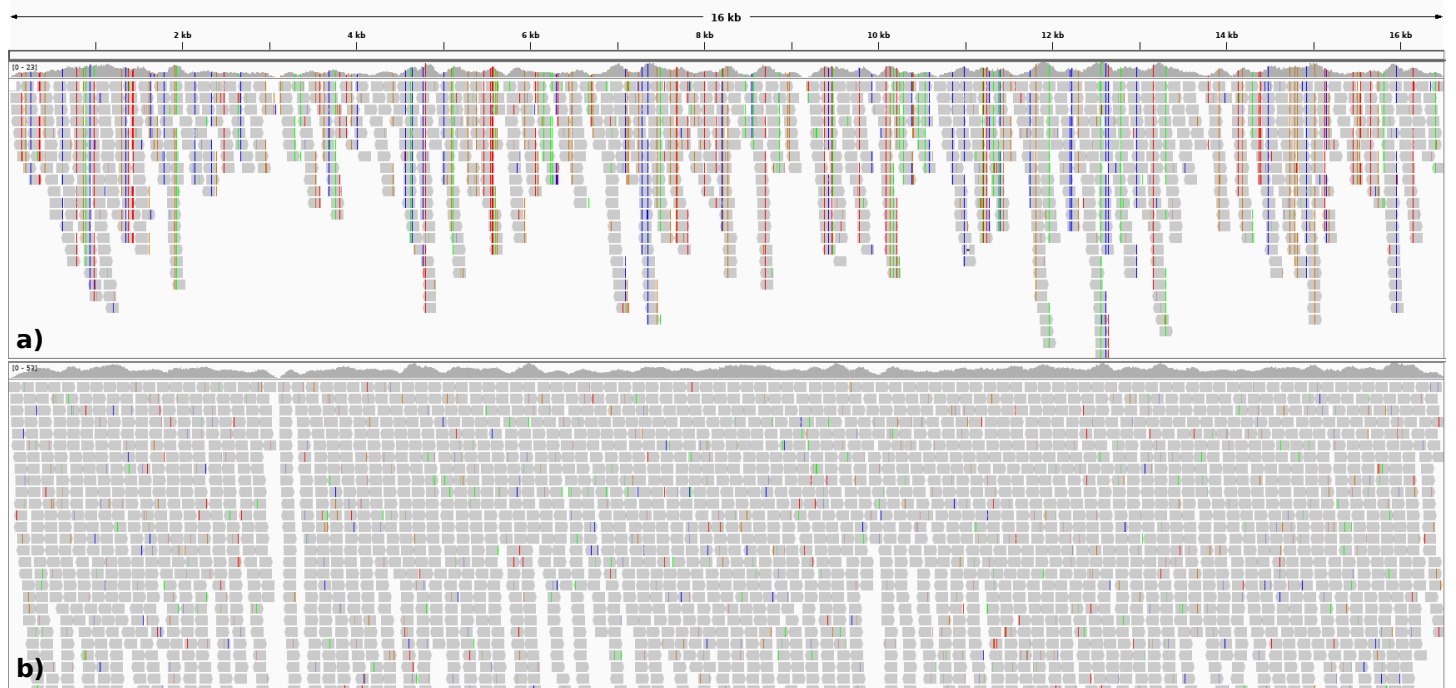

Figure S1: Alignments using Bowtie2 of simulated mitochondrial reads relative to the reference genome. a) the sequence is mutated with 1% substitutions in a brain sample, simulated with 10x depth coverage; b) sequence without mutations from a bone sample with a simulated depth coverage of 30. The identified SNPs are highlighted with vertical colored stripes. Visual map extracted from IGV.

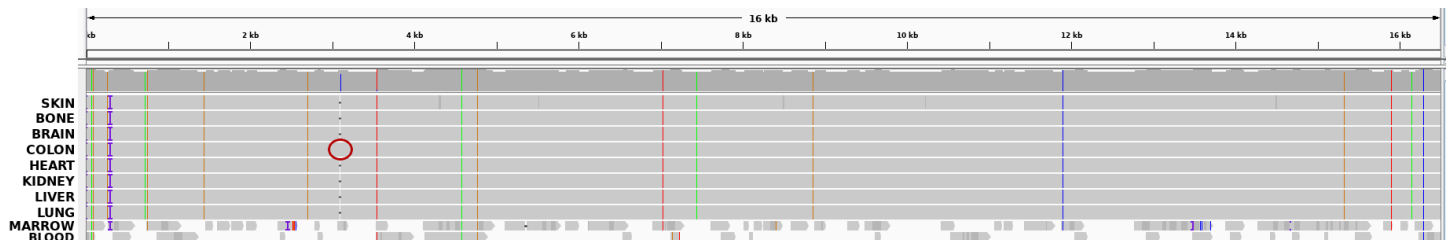

Figure S2: Alignments using BWA of the consensus sequences of real mitochondrial sequences from multiple organs. The identified SNPs are highlighted with vertical colored stripes. Consensus SNPs: 72 T→A, 93 A→G, 263 A→G, 309 +CT, 722 C→A, 750 A→G, 1438 A→G, 2706 A→G, 3106 -C, 3549 C→T, 4580 G→A, 4769 A→G, 7028 C→T, 7444 G→A, 8860 A→G, 11899 T→C, 15326 A→G, 15904 C→T, 16153 G→A, 16298 T→C. Visual map extracted from IGV.

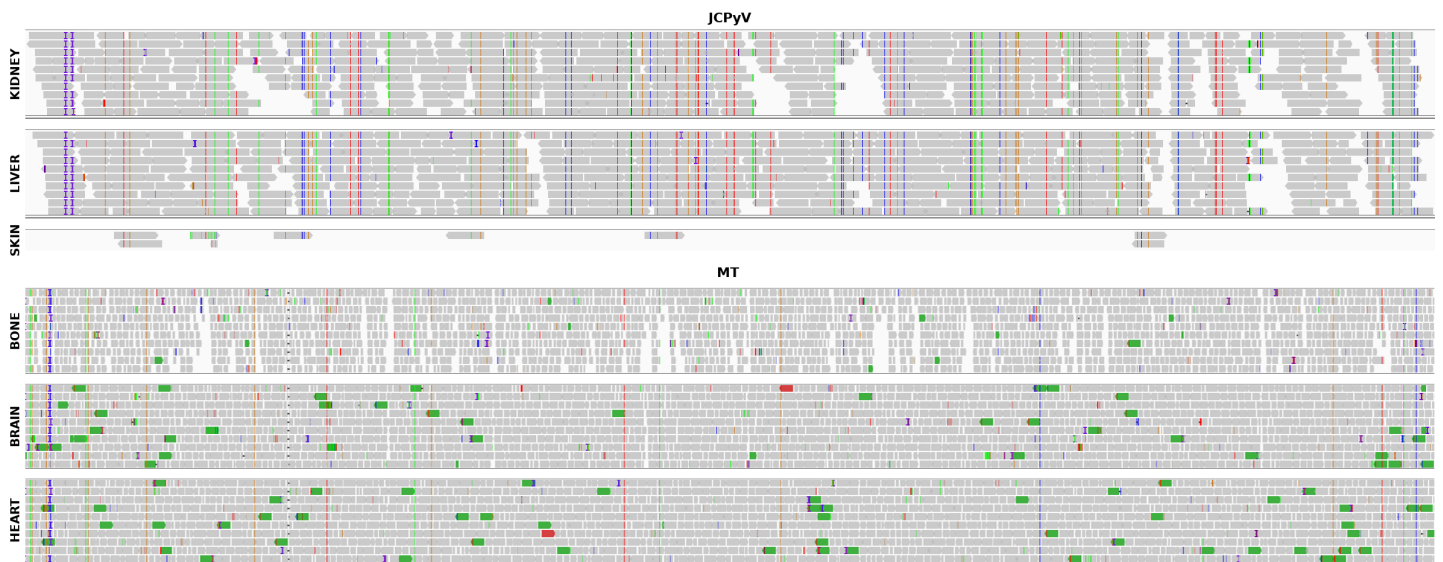

Figure S3: Visualization of the read alignments of each organ sample for JCPyV and the human mitogenome (MT). The maps have been adapted from the IGV. Each map shows the complete alignments in the respective scale. The JCPyV maps include duplicate removal while the MT maps contain the duplications, as an example of TRACESPipe being able to filter or maintain the duplications (reads highlighted green by IGV show possible duplications). Vertical lines stand for SNPs. Red reads refer to an inferred insert size that is larger than expected (possible evidence of a deletion).

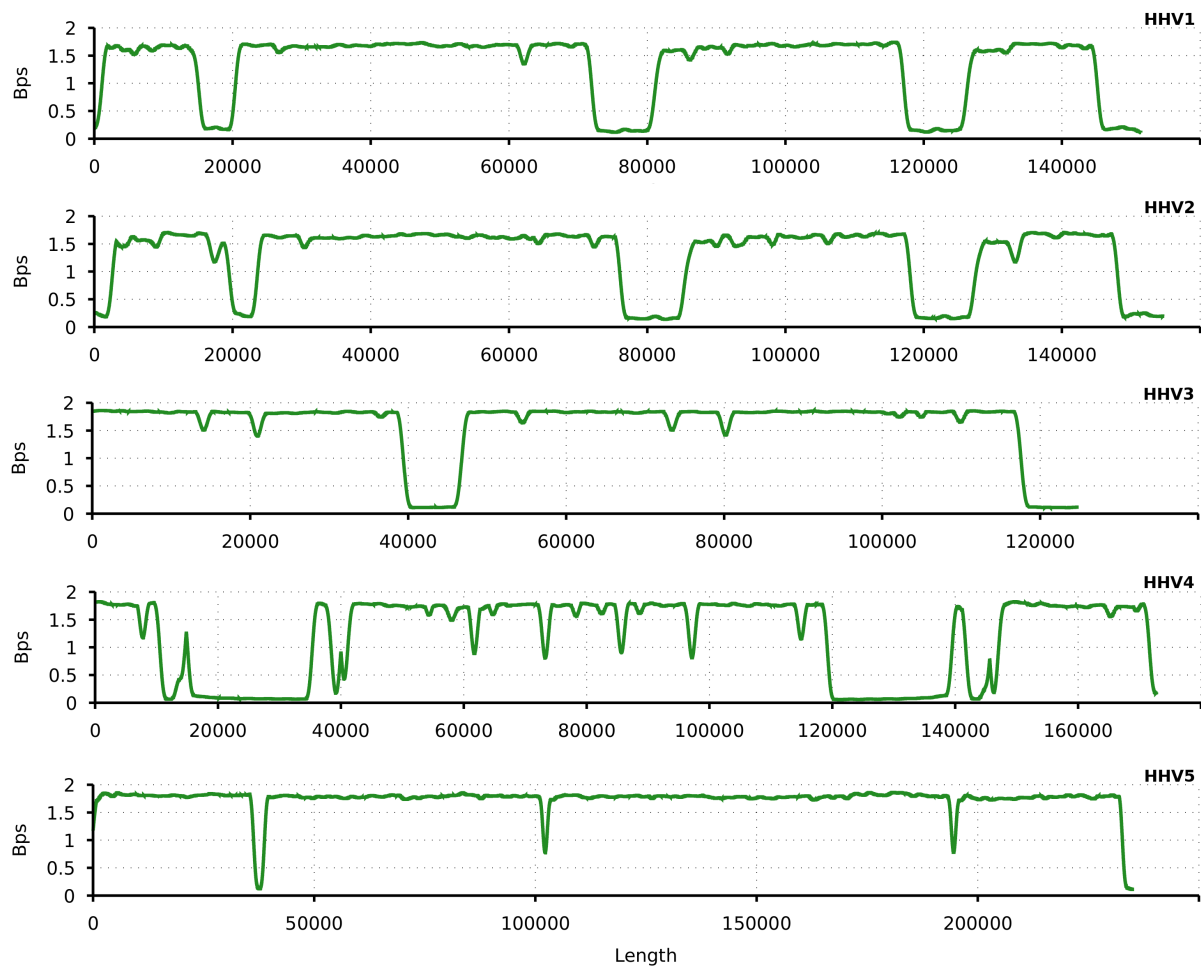

Figure S4: Complexity profiles for several Human Herpesvirus (HHV1, HHV2, HHV3, HHV4, and HHV5). Lower regions correspond to close or distant repetitive regions. The profiles were computed with TRACESPipe using GTO.

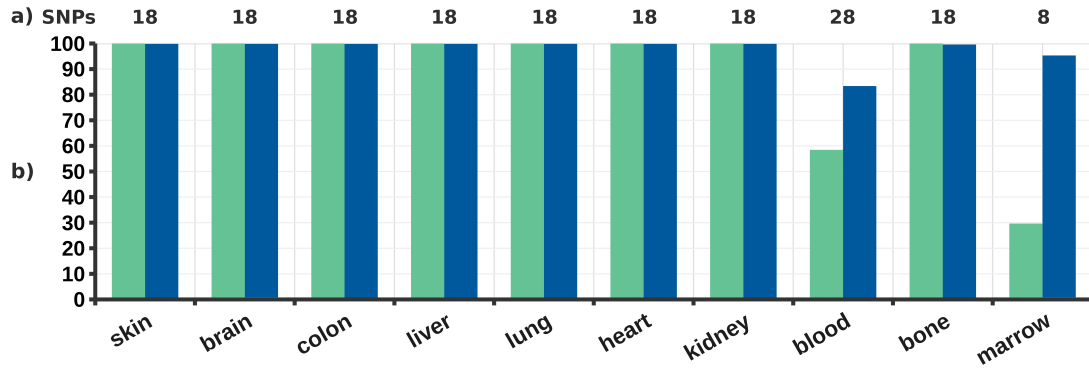

Figure S5: a) Number of SNPs; b) percentage of aligned bases (green) and nucleotide identity (blue) of the human mitogenome reference relative to the reconstructed sequence. The number of SNPs, percentage of aligned bases, and nucleotide identity have been automatically computed with TRACESPipe using dnadiff from the Mummer4 package.

|      | Blood |      |      | Bone |      |      | Brain |      |      | Hair |      |      | Heart |      |      | Kidney |      |      | Liver |      |      | Lung |      |      | Skin |      |      | Teeth |      |      |
|------|-------|------|------|------|------|------|-------|------|------|------|------|------|-------|------|------|--------|------|------|-------|------|------|------|------|------|------|------|------|-------|------|------|
| SEQ  | F     | D    | S    | F    | D    | S    | F     | D    | S    | F    | D    | S    | F     | D    | S    | F      | D    | S    | F     | D    | S    | F    | D    | S    | F    | D    | S    | F     | D    | S    |
| B19V | ✓     | 40   | 0    | ✓    | 30   | 1    | ✓     | 10   | 0    | ✗    | -    | -    | ✓     | 20   | 20   | ✓      | 20   | 0    | ✗     | -    | -    | ✗    | -    | -    | ✓    | 25   | 0    | ✓     | 30   | 5    |
|      | ✓     | 48.3 | 100  | ✓    | 36.0 | 100  | ✓     | 12.4 | 100  | ✗    | 0.0  | 0    | ✓     | 0.1  | 5.5  | ✓      | 24.9 | 100  | ✗     | 0.0  | 0    | ✗    | 0.0  | 0    | ✓    | 28.2 | 100  | ✓     | 32.3 | 100  |
| HHV2 | ✓     | 40   | 0    | ✗    | -    | -    | ✗     | -    | -    | ✗    | -    | -    | ✗     | -    | -    | ✓      | 20   | 0    | ✗     | -    | -    | ✗    | -    | -    | ✗    | -    | -    | ✓     | 30   | 0    |
|      | ✓     | 58.3 | 100  | ✗    | 0.0  | 0    | ✗     | 0.0  | 0    | ✗    | 0.0  | 0    | ✗     | 0.0  | 0    | ✓      | 28.7 | 100  | ✗     | 0.0  | 0    | ✗    | 0.0  | 0    | ✗    | 0.0  | 0    | ✓     | 43.4 | 100  |
| HHV3 | ✓     | 40   | 0    | ✗    | -    | -    | ✗     | -    | -    | ✗    | -    | -    | ✗     | -    | -    | ✗      | -    | -    | ✗     | -    | -    | ✗    | -    | -    | ✓    | 25   | 0    | ✗     | -    | -    |
|      | ✓     | 45.3 | 100  | ✗    | 0.0  | 0    | ✗     | 0.0  | 0    | ✗    | 0.0  | 0    | ✗     | 0.0  | 0    | ✗      | 0.0  | 0    | ✗     | 0.0  | 0    | ✗    | 0.0  | 0    | ✓    | 28.8 | 100  | ✗     | 0.0  | 0    |
| HHV4 | ✗     | -    | -    | ✗    | -    | -    | ✓     | 10   | 0    | ✓    | 5    | 0    | ✗     | -    | -    | ✗      | -    | -    | ✓     | 20   | 1    | ✓    | 10   | 1    | ✗    | -    | -    | ✗     | -    | -    |
|      | ✗     | 0.0  | 0    | ✗    | 0.0  | 0    | ✓     | 51.7 | 99.9 | ✓    | 24.4 | 96.6 | ✗     | 0.0  | 0    | ✗      | 0.0  | 0    | ✓     | 92.5 | 100  | ✓    | 51.6 | 99.9 | ✗    | 0.0  | 0    | ✗     | 0.0  | 0    |
| HHV8 | ✓     | 40   | 0    | ✗    | -    | -    | ✗     | -    | -    | ✗    | -    | -    | ✗     | -    | -    | ✗      | -    | -    | ✗     | -    | -    | ✗    | -    | -    | ✗    | -    | -    | ✗     | -    | -    |
|      | ✓     | 106  | 100  | ✗    | 0.0  | 0    | ✗     | 0.0  | 0    | ✗    | 0.0  | 0    | ✗     | 0.0  | 0    | ✗      | 0.0  | 0    | ✗     | 0.0  | 0    | ✗    | 0.0  | 0    | ✗    | 0.0  | 0    | ✗     | 0.0  | 0    |
| HPV  | ✗     | -    | -    | ✗    | -    | -    | ✓     | 5    | 10   | ✓    | 20   | 10   | ✗     | -    | -    | ✓      | 20   | 0    | ✗     | -    | -    | ✗    | -    | -    | ✗    | -    | -    | ✗     | -    | -    |
|      | ✗     | 0.0  | 0    | ✗    | 0.0  | 0    | ✓     | 3.3  | 86.4 | ✓    | 12.5 | 98   | ✗     | 0.0  | 0    | ✓      | 19.9 | 99.8 | ✗     | 0.0  | 0    | ✗    | 0.0  | 0    | ✗    | 0.0  | 0    | ✗     | 0.0  | 0    |
| TTV  | ✗     | -    | -    | ✓    | 30   | 10   | ✗     | -    | -    | ✗    | -    | -    | ✗     | -    | -    | ✓      | 20   | 15   | ✗     | -    | -    | ✗    | -    | -    | ✓    | 25   | 0    | ✓     | 30   | 0    |
|      | ✗     | 0.0  | 0    | ✓    | 18.3 | 87.6 | ✗     | 0.0  | 0    | ✗    | 0.0  | 0    | ✗     | 0.0  | 0    | ✓      | 2.0  | 28.9 | ✗     | 0.0  | 0    | ✗    | 0.0  | 0    | ✓    | 24.2 | 96.5 | ✓     | 29.1 | 99.7 |
| VARV | ✓     | 40   | 0    | ✗    | -    | -    | ✓     | 10   | 0    | ✗    | -    | -    | ✓     | 20   | 5    | ✗      | -    | -    | ✓     | 20   | 0    | ✓    | 10   | 0    | ✗    | -    | -    | ✗     | -    | -    |
|      | ✓     | 43.7 | 100  | ✗    | 0.0  | 0.0  | ✓     | 10.9 | 99.8 | ✗    | 0.0  | 0.0  | ✓     | 21.8 | 100  | ✗      | 0.0  | 0.0  | ✓     | 22.1 | 100  | ✓    | 11.1 | 99.8 | ✗    | 0.0  | 0.0  | ✗     | 0.0  | 0.0  |
| MT   | ✓     | 40   | 0    | ✓    | 30   | 0    | ✓     | 10   | 1    | ✓    | 5    | 0    | ✓     | 20   | 0    | ✓      | 20   | 1    | ✓     | 20   | 2    | ✓    | 10   | 0    | ✓    | 25   | 0    | ✓     | 30   | 5    |
|      | ✓     | 39.2 | 99.9 | ✓    | 29.5 | 99.8 | ✓     | 9.8  | 99.3 | ✓    | 4.9  | 96.1 | ✓     | 19.7 | 99.7 | ✓      | 19.7 | 99.7 | ✓     | 19.8 | 99.8 | ✓    | 9.8  | 99.4 | ✓    | 24.6 | 99.8 | ✓     | 28.7 | 99.3 |

Table S1: Benchmark of TRACESPipe (depth and breadth coverage) in viral and mitogenomes from 10 different organs. In each SEQ line, the upper line is the statistical ground truth (simulation conditions), while the bottom line represents the TRACESPipe output. The F stands for the existence or not of the respective virus in the organ sample, where the ✓ stands for viral or mitochondrial genome detection in the sample, while ✗ for the opposite. The D stands for the depth coverage and S for the breadth coverage. To replicate use script Benchmark.sh from the repository.

| Organ name | Virus name | Genome length | Aligned bases (%) | Identity (%) | Number of SNPs |
|------------|------------|---------------|-------------------|--------------|----------------|
| Bood       | B19V       | 5773          | 100.00            | 100.00       | 0              |
| Bood       | VARV       | 5773          | 100.00            | 100.00       | 0              |
| Bone       | B19V       | 4991          | 100.00            | 100.00       | 0              |
| Bone       | VARV       | 4991          | 100.00            | 100.00       | 0              |
| Brain      | B19V       | 6773          | 100.00            | 100.00       | 0              |
| Brain      | VARV       | 6773          | 100.00            | 100.00       | 0              |

Table S2: Benchmark of TRACESPipe when hybrid viral species with mutated parts are present in the data. The FASTQ data was simulated with ART. The aligned bases, genome identity and numbers of SNPs refer to the comparison between the original and reconstructed sequences. To replicate use script HybridSpecies.sh from the repository.

## 2 Reproducibility

### 2.1 Installation

To install TRACESPipe, the following commands must be executed

```
1 git clone https://github.com/viromelab/tracespipe.git
```

```

2 cd tracespipe/src/
3 chmod +x TRACES*.sh
4 ./TRACESPipe.sh --install
5 ./TRACESPipe.sh --get-all-aux

```

## 2.2 Configuration

Since the pipeline considers multi-organs, there is a simple configuration process that must be followed, namely:

- Adding the **FASTQ** files **gzipped** at the **input\_data** folder.
- Adding a file exclusively with name **meta.info.txt** at the folder **meta\_data**.

This **meta.info.txt** file needs to specify the organ type (single word name) and the filenames for the paired end reads. An example of the content of meta.info.txt is the following:

```

1 skin:V1_S44_R1_001.fastq.gz:V1_S44_R2_001.fastq.gz
2 brain:V2_S29_R1_001.fastq.gz:V2_S29_R2_001.fastq.gz
3 colon:V3_S45_R1_001.fastq.gz:V3_S45_R2_001.fastq.gz

```

## 2.3 Benchmark

### 2.3.1 Synthetic benchmark

The following commands run the synthetic benchmark

```

1 cd ../demos
2 ./Benchmark.sh 2>> tmp

```

The output provided by TRACESPipe is the following

```

1 blood
2 B19 5596(100.00%) 100.00 0
3 HV2 154675(100.00%) 100.00 0
4 HV3 124875(99.99%) 100.00 0
5 HV8 137961(99.99%) 100.00 0
6 VARV 185559(99.99%) 100.00 0
7 mtDNA 16557(99.93%) 99.98 0
8
9 bone
10 B19 5596(100.00%) 99.96 2
11 TTV 2784(99.96%) 100.00 0
12 mtDNA 16546(99.86%) 99.98 0
13
14 brain
15 B19 5596(100.00%) 100.00 0
16 HV4 172743(99.99%) 99.93 2
17 VARV 185424(99.92%) 99.87 2
18 mtDNA 16539(99.82%) 99.53 1
19
20 hair
21 HV4 168866(97.74%) 98.77 11
22 HPV 7070(95.89%) 98.84 0
23 mtDNA 16127(97.33%) 98.79 1
24
25 heart
26 B19 5588(100.00%) 100.00 0
27 HPV 7351(99.72%) 100.00 0
28 VARV 185571(100.00%) 99.99 21
29 mtDNA 16539(99.82%) 99.92 0
30
31 kidney
32 B19 5596(100.00%) 100.00 0
33 HV2 154675(100.00%) 100.00 0
34 TTV 2756(99.96%) 100.00 0
35 mtDNA 16539(99.82%) 99.92 0
36
37 liver
38 HV4 172728(99.98%) 99.85 264
39 HPV 7358(99.81%) 100.00 0
40 VARV 185555(99.99%) 100.00 0
41 mtDNA 16549(99.88%) 99.87 0
42
43 lung

```

```

44 HV4 172699(99.96%) 99.80 286
45 VARV 185388(99.90%) 99.91 1
46 mtDNA 16539(99.82%) 99.53 1
47
48 skin
49 B19 5596(100.00%) 100.00 0
50 HV3 124880(100.00%) 100.00 0
51 TTV 2687(96.48%) 100.00 0
52 mtDNA 16546(99.86%) 99.98 0
53
54 teeth
55 B19 5594(99.96%) 99.91 5
56 HV2 154675(100.00%) 100.00 0
57 TTV 2775(99.64%) 100.00 0
58 mtDNA 16510(99.64%) 99.69 0

```

### 2.3.2 Hybrid species test

The following commands (at demos/ folder) run the hybrid species Benchmark

```
1 ./HybridSpecies.sh 2>> tmp
```

The output provided by TRACESPipe is the following

```

1 Bood
2 B19 5773(100.00%) 100.00 0
3 VARV 5773(100.00%) 100.00 0
4
5 Bone
6 B19 4991(100.00%) 100.00 0
7 VARV 4991(100.00%) 100.00 0
8
9 Brain
10 B19 6773(100.00%) 100.00 0
11 VARV 6773(100.00%) 100.00 0

```

## 2.4 Data analysis

The reads were copied into the input\_data and the whole data analysis was configured with

```

1 skin:V17_S57_R1_001.fastq.gz:V17_S57_R2_001.fastq.gz
2 brain:V18_S31_R1_001.fastq.gz:V18_S31_R2_001.fastq.gz
3 colon:V19_S32_R1_001.fastq.gz:V19_S32_R2_001.fastq.gz
4 liver:V20_S33_R1_001.fastq.gz:V20_S33_R2_001.fastq.gz
5 lung:V21_S58_R1_001.fastq.gz:V21_S58_R2_001.fastq.gz
6 heart:V22_S42_R1_001.fastq.gz:V22_S42_R2_001.fastq.gz
7 kidney:V23_S59_R1_001.fastq.gz:V23_S59_R2_001.fastq.gz
8 blood:V24_S60_R1_001.fastq.gz:V24_S60_R2_001.fastq.gz
9 bone:V53_S5_R1_001.fastq.gz:V53_S5_R2_001.fastq.gz
10 marrow:V54_S6_R1_001.fastq.gz:V54_S6_R2_001.fastq.gz

```

The command for the entire ran was

```

1 ./TRACESPipe.sh
2 --run-meta # It runs the full viral metagenomic composition analysis
3 --inter-sim-size 20 # Control: detect similarity between the best 20 references
4 --run-all-v-align # It runs all the viral alignments and creates consensus sequences
5 --run-mito # It runs all the mtDNA alignments and creates consensus sequences
6 --remove-dup # It removes duplications
7 --run-de-novo # It runs de-novo assembly
8 --run-hybrid # It combines alignment-based with de-novo assembly
9 --min-similarity 5 # It only aligns and assembles sequences with similarity above 5%
10 --view-top 5 # It print the best 5 references (not mandatory but gives running info)
11 --best-of-bests # It chooses and forces to use the best reference among the organs
12 --very-sensitive # It uses very sensitive parameters for alignments
13 --run-diff # It runs diff between best reference & reconstructed (SNPs & identity)
14 --run-multiorgan-consensus # It runs alignments/consensus of all the reconstructed organ sequences

```

The full output is automatically provided at the output\_data folder according to

```

1 TRACES_results/ # where the metagenomic analysis files and control will appear
2 TRACES_results/profiles/ # where the redundancy profiles appear
3
4 TRACES_viral_alignments/ # where viral alignments and index will appear
5 TRACES_viral_consensus/ # where viral consensus (FASTA) will appear
6 TRACES_viral_bed/ # where viral BED files will appear (SNPs and Coverage)

```

```

7 TRACES_viral_statistics/      # where viral statistics appear (depth/wide coverage)
8
9 TRACES_mtdna_alignments/     # where mtdna alignments and index will appear
10 TRACES_mtdna_consensus/     # where mtdna consensus (FASTA) will appear
11 TRACES_mtdna_bed/           # where mtdna BED files will appear (SNPs and Coverage)
12 TRACES_mtdna_statistics/    # where mtdna statistics appear (depth/wide coverage)
13 TRACES_mtdna_authentication/ # where mtdna species and population authentication appears
14
15 TRACES_cy_alignments/        # where cy alignments and index will appear
16 TRACES_cy_consensus/        # where cy consensus (FASTA) will appear
17 TRACES_cy_bed/              # where cy BED files will appear (SNPs and Coverage)
18 TRACES_cy_statistics/       # where cy statistics appear (depth/wide coverage)
19
20 TRACES_specific_alignments/  # where specific alignments and index will appear
21 TRACES_specific_consensus/   # where specific consensus (FASTA) will appear
22 TRACES_specific_bed/        # where specific BED files will appear
23 TRACES_specific_statistics/  # where specific statistics appear (depth/wide coverage)
24
25 TRACES_mtdna_damage_<ORGAN>/ # where the mtdna damage estimation files will appear
26
27 TRACES_denovo_<ORGAN>/      # where the output of de-novo assembly appears
28
29 TRACES_hybrid_alignments/    # where the hybrid data appears
30 TRACES_hybrid_consensus/    # where the hybrid data appears
31 TRACES_hybrid_bed/          # where the hybrid data appears
32
33 TRACES_hybrid_R2_alignments/ # where the second round hybrid data appears
34 TRACES_hybrid_R2_consensus/  # where the second round hybrid data appears
35 TRACES_hybrid_R2_bed/       # where the second round hybrid data appears
36
37 TRACES_hybrid_R3_alignments/ # where the third round hybrid data appears
38 TRACES_hybrid_R3_consensus/  # where the third round hybrid data appears
39 TRACES_hybrid_R3_bed/       # where the third round hybrid data appears
40
41 TRACES_hybrid_R4_alignments/ # where the fourth round hybrid data appears
42 TRACES_hybrid_R4_consensus/  # where the fourth round hybrid data appears
43 TRACES_hybrid_R4_bed/       # where the fourth round hybrid data appears
44
45 TRACES_hybrid_R5_consensus/  # where the automatic chosen hybrid consensus
46                             # appears (diff will be made using this data)
47
48 TRACES_multiorgan_alignments/ # where the multi-organ alignments data appears
49 TRACES_multiorgan_consensus/  # where the multi-organ consensus data appears
50
51 TRACES_diff/                 # where the dnadiff results appear (identity & SNPs)
52
53 TRACES_blasts/               # where the specific blasted results appears

```
